# Supplementary material
Source: HighWire-hosted journal article supplement (https://www.cmajopen.ca/highwire/filestream/89382/field_highwire_adjunct_files/1/2022-0072-at-2.pdf)
Supplement: 2022-0072-at-2.pdf [file 2022-0072-at-2.pdf]

Appendix 2, as supplied by the authors. Appendix to: Chelabi K, Osmanlliu E, Gravel J, et al. The effect of the COVID-19 pandemic on pediatric asthma-related emergency department visits and hospital admissions in Montréal, Quebec: a retrospective cohort study. *CMAJ Open* 2023. doi:10.9778/cmajo.2022-0072. Copyright © 2023 The Author(s) or their employer(s). To receive this resource in an accessible format, please contact us at [cmaigroup@cmaj.ca](mailto:cmaigroup@cmaj.ca).

**A) Asthma-related ED visits (adjusted for seasonality), Jan 2017-Jun 2021**

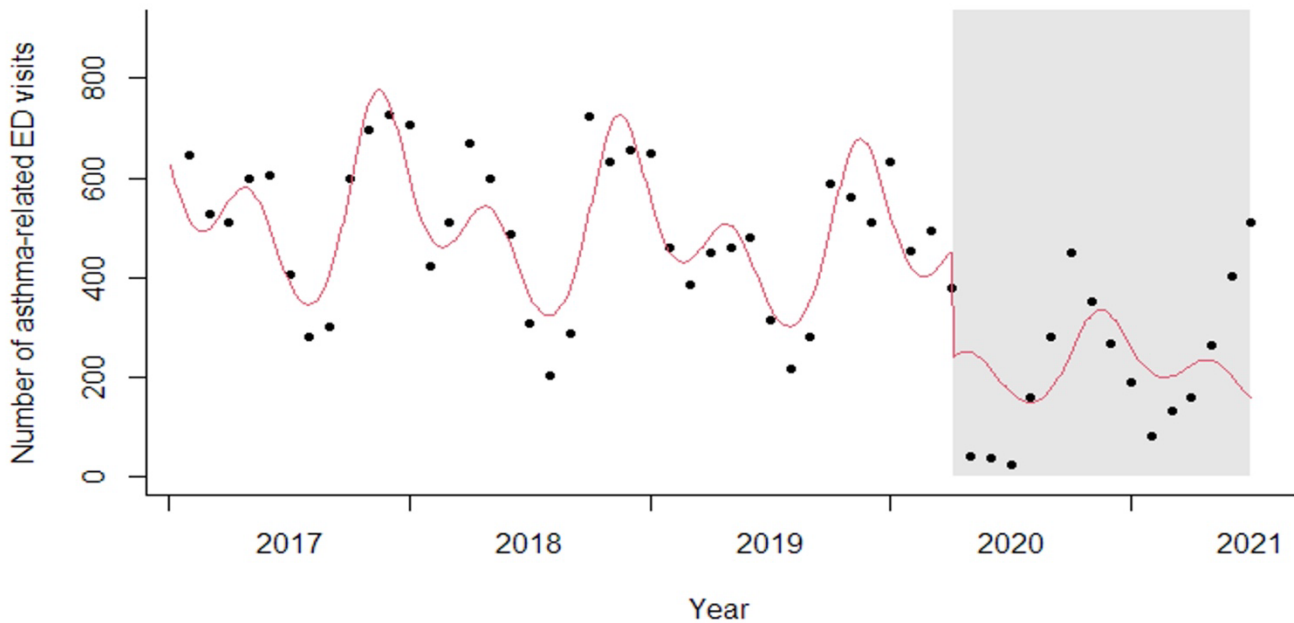

**B) Asthma-related hospitalisations (adjusted for seasonality), Jan 2017-Jun 2021**

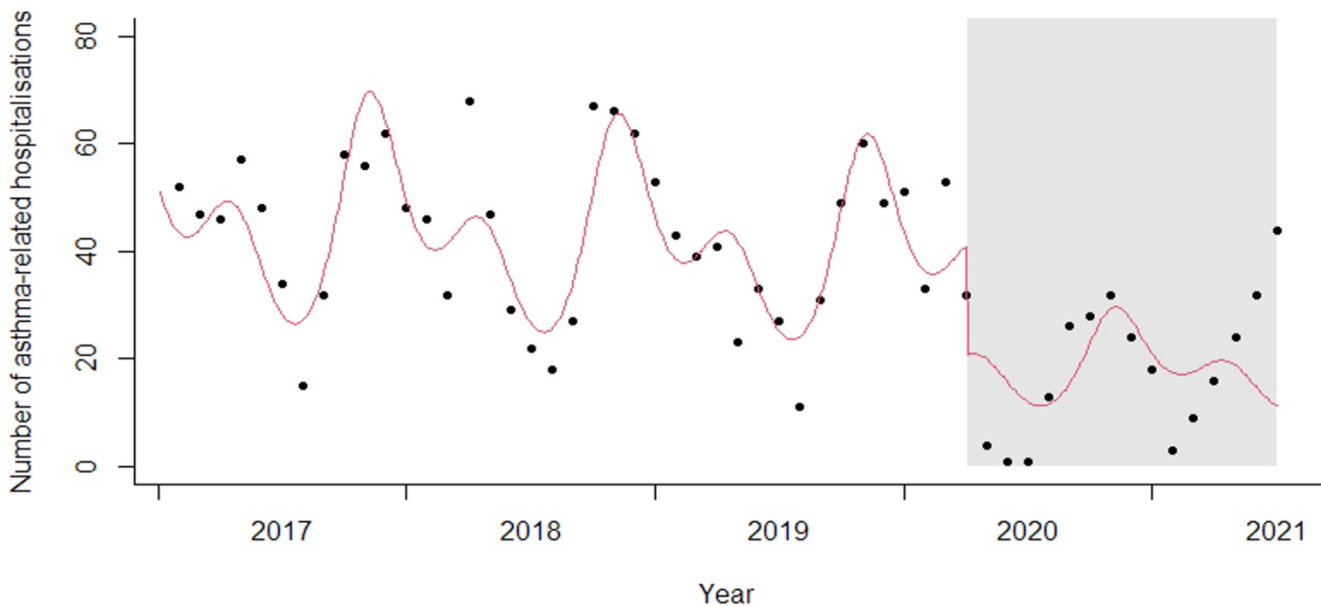

Supplementary Figure 1. **Incidence of asthma-related emergency department (ED) visits (graph A) and hospitalizations (graph B) from January 2017 to June 2021 adjusted for seasonality.** The dots represent the monthly incidence of ED visits or hospitalizations. The red line denotes the trend adjusted for seasonality. The COVID-19 pandemic period is represented in grey, starting April 1, 2020. There is a significant reduction in ED visits (46% decrease, 95% CI: 34-63%;  $p=0.001$ ) and hospitalizations (49% decrease, 95% CI: 34-66%;  $p=0.002$ ) between the pre-pandemic and the pandemic period.

*Abbreviations.* ED: emergency department.
